# Supplementary material for: Unusual nitro-coordination of europium(iii) and terbium(iii) with pyridinyl ligands
Source: Royal Society of Chemistry journal article supplement (doi:10.1039/c2dt31308a), 2012-01-01

Supporting Information

**Unusual Nitro-Coordination of Europium(III) and Terbium(III) with  
Pyridinyl Ligands**

Ana de Bettencourt-Dias,<sup>\*a</sup> Sebastian Bauer,<sup>a</sup> Subha Viswanathan<sup>b</sup>, Brandi C. Maull<sup>a</sup> and  
Ayuk M. Ako<sup>a</sup>

<sup>a</sup> Department of Chemistry, University of Nevada, Reno, Reno, Nevada, USA. Fax: +1 775 784 6804; Tel: +1 775 682 8421; E-mail:  
abd@unr.edu

<sup>b</sup> Department of Radiology, University of Chicago, Chicago, Illinois, USA.

Figure S1. Crystal packing of **5a** showing the molecular planes.

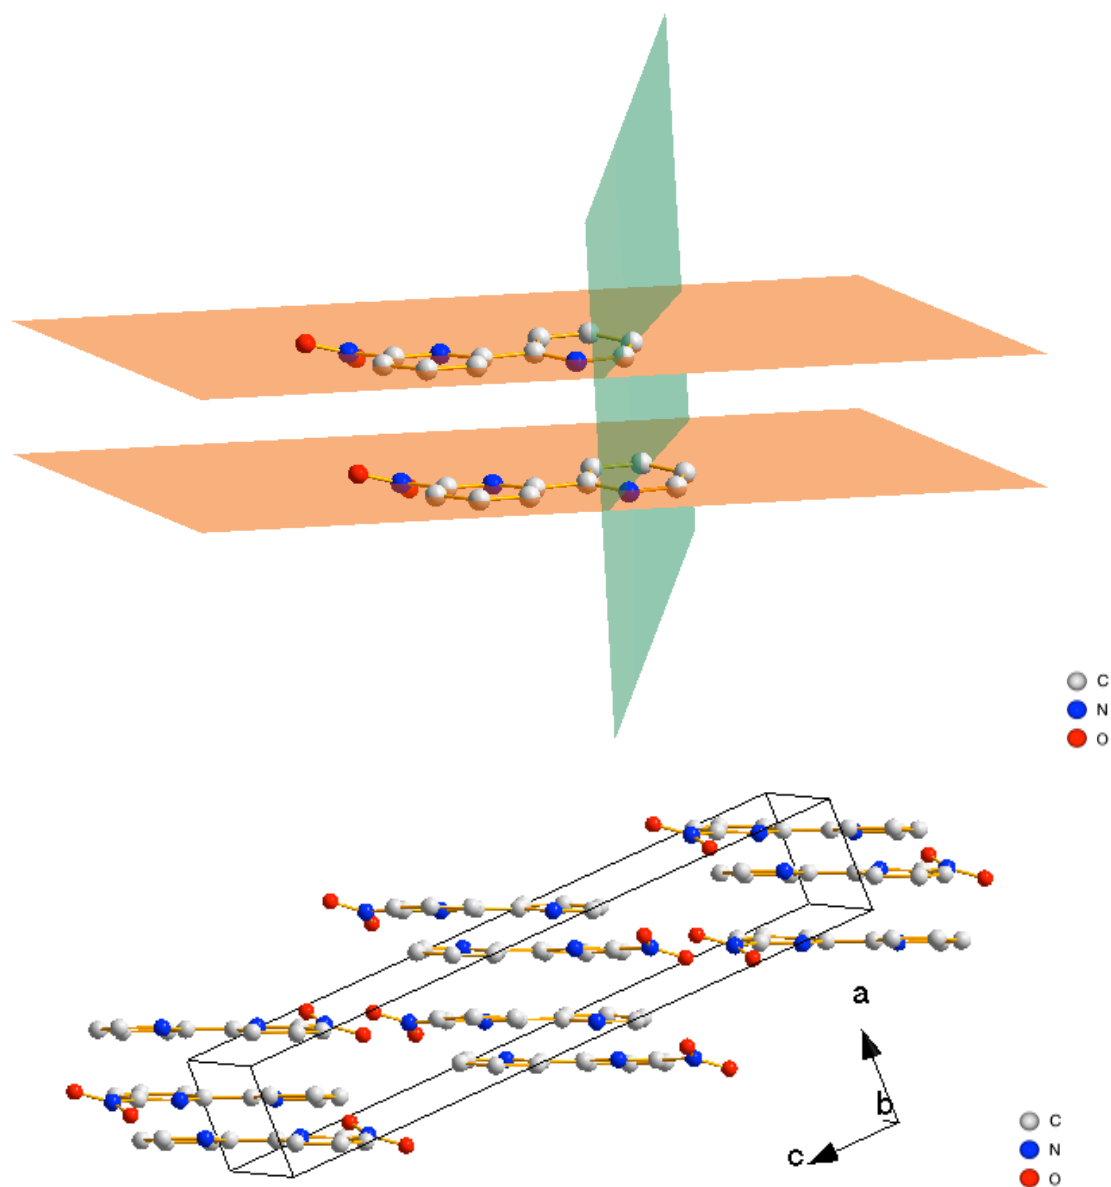

Figure S2.  $^1\text{H}$  NMR spectra of the ligands **5a**, **5b**, **5c** and **6** in acetonitrile- $\text{d}_3$  without  $\text{Eu}(\text{NO}_3)_3$  (bottom red trace) and after adding an equimolar amount of  $\text{Eu}(\text{NO}_3)_3$  (top blue trace). Legend: \* = water; # = acetonitrile- $\text{d}_3$

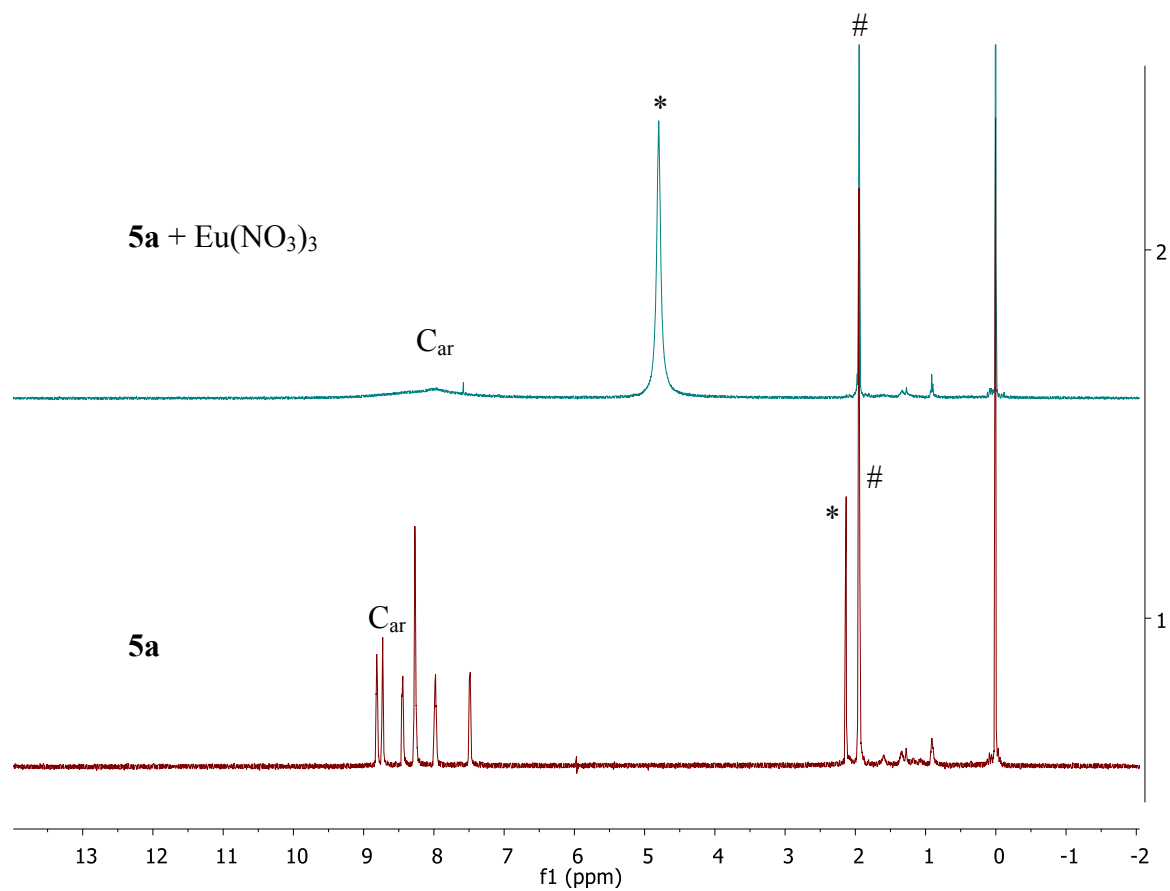

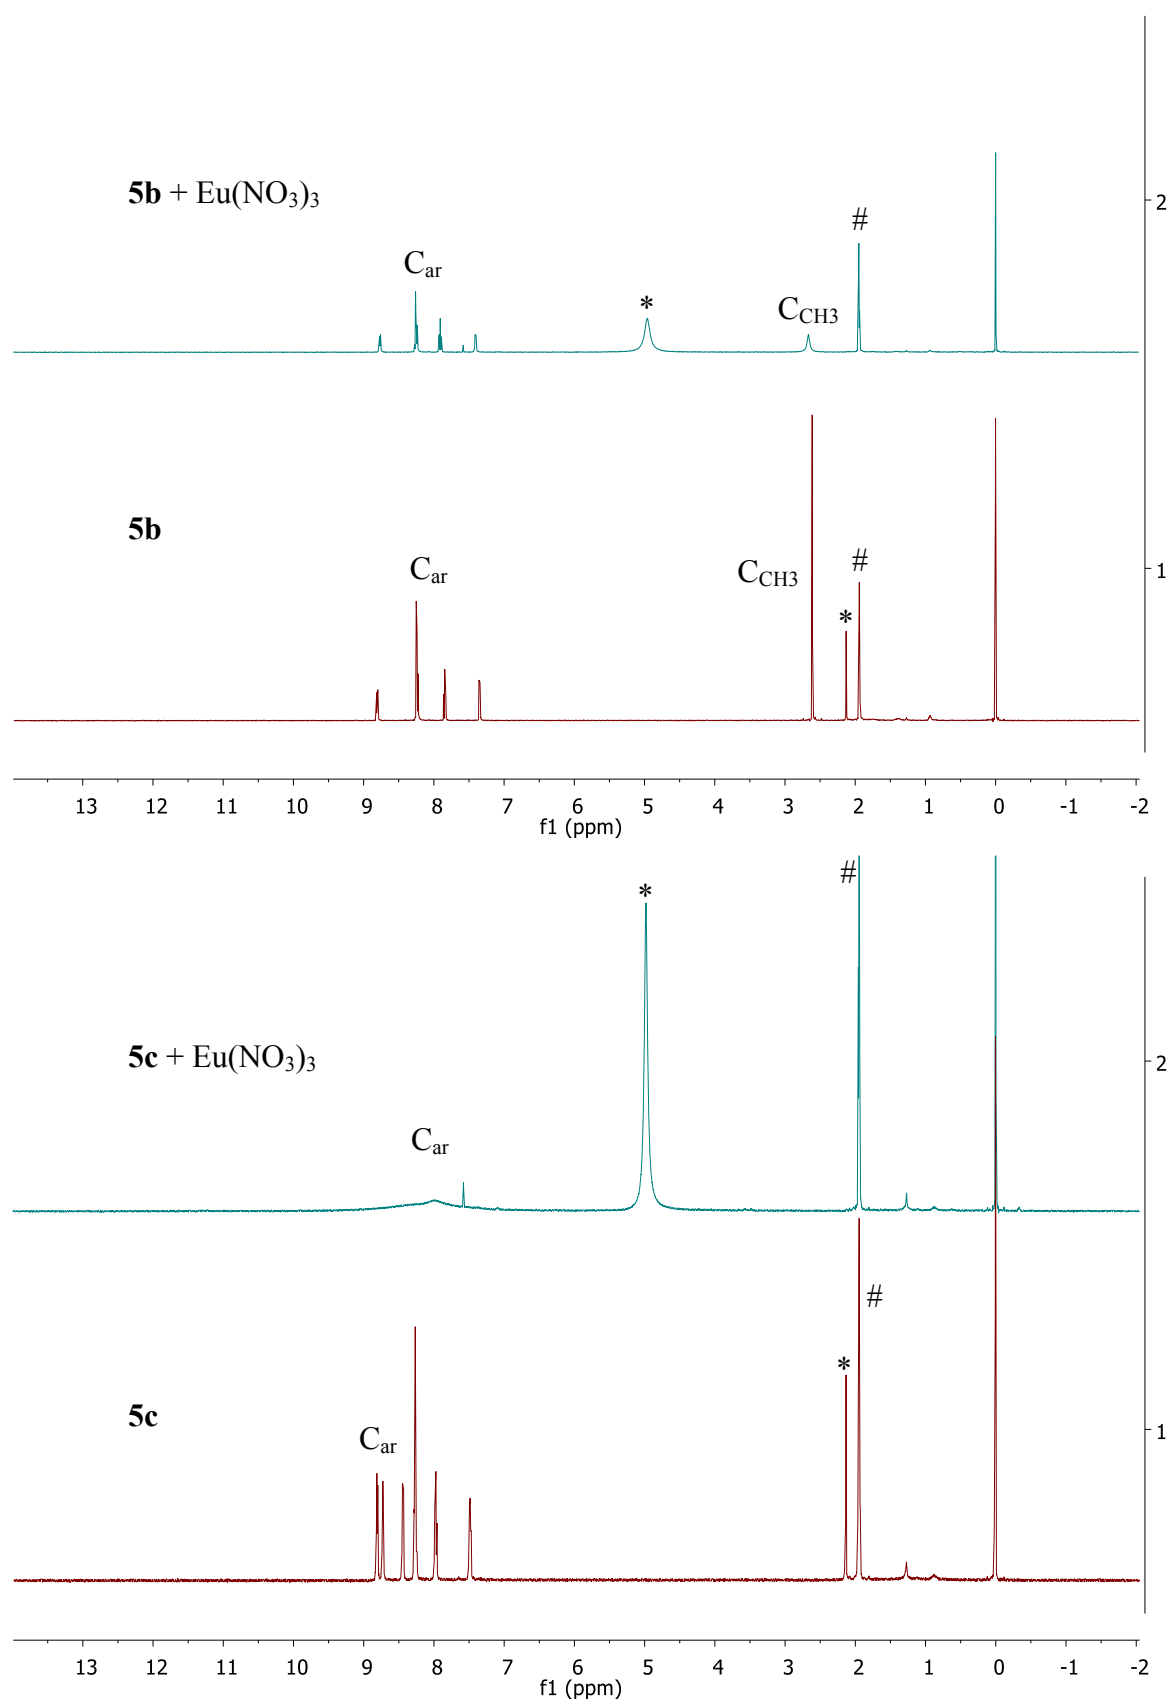

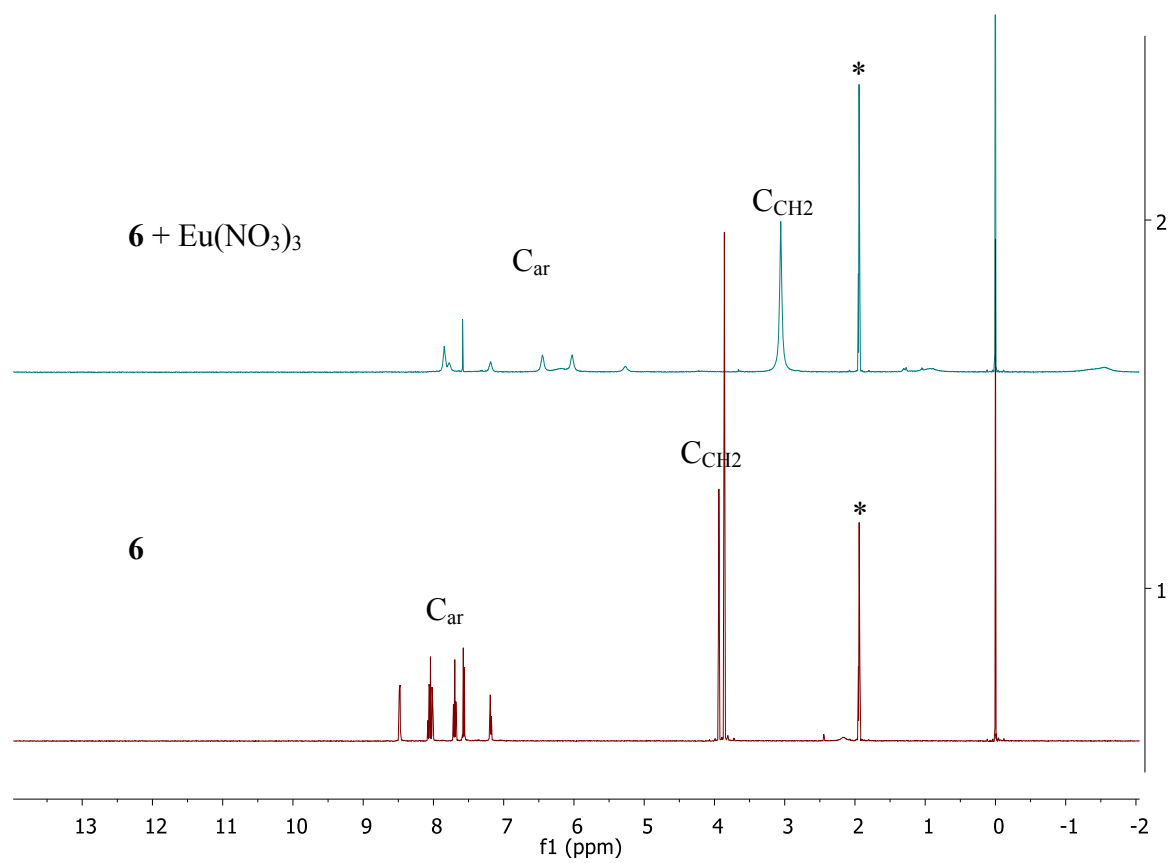

Figure S3. H...F interactions in the solid-state structure of **6Eu**.

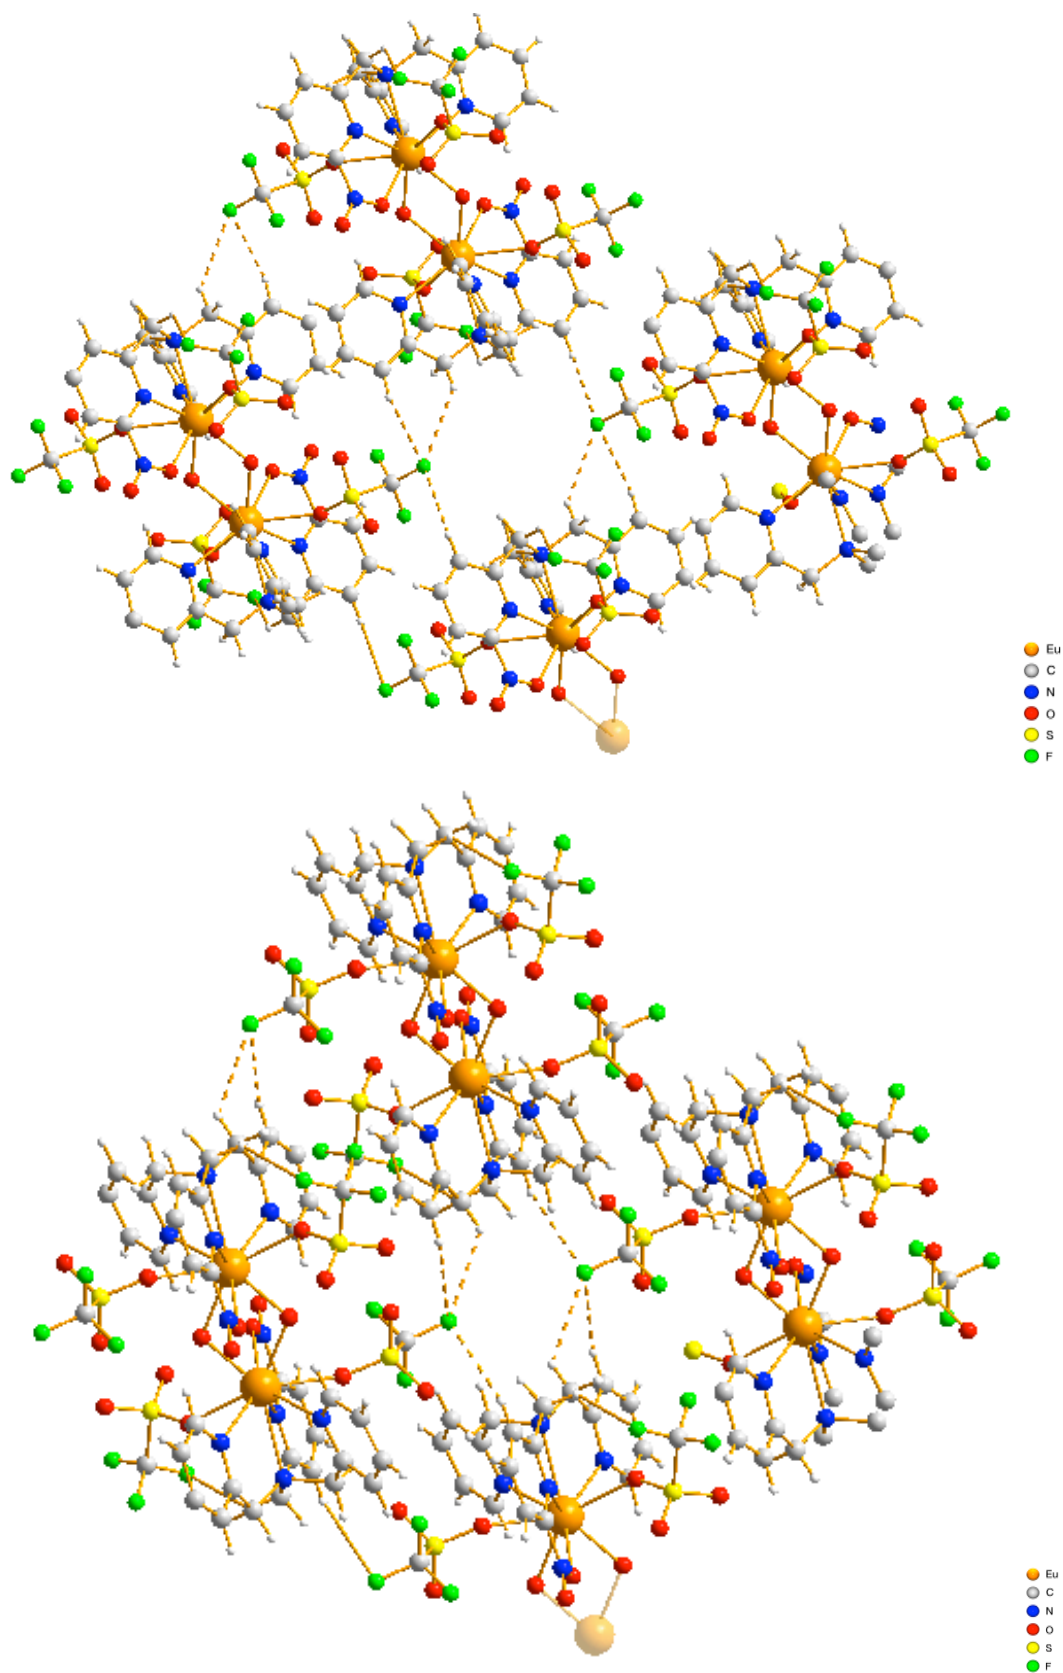

Supplement: c2dt31308a.pdf [file c2dt31308a.pdf]
